# Supplementary material for: How Do Joint Kinematics and Kinetics Change When Walking Overground with Added Mass on the Lower Body?
Source: MDPI journal article supplement (doi:10.3390/s22239177), 2022-11-25
Supplement: s1 [file s1]

**Table S1.** Participant demographics.

| Gender | Number | Age<br>(years) | Body mass<br>(kg) | Body height<br>(m) | BMI<br>(kg / m <sup>2</sup> ) |
|--------|--------|----------------|-------------------|--------------------|-------------------------------|
| Female | 10     | 20.4 ± 1.3     | 63.2 ± 7.4        | 1.74 ± 0.07        | 20.9 ± 2.0                    |
| Male   | 9      | 25.6 ± 3.4     | 77.1 ± 13.3       | 1.78 ± 0.09        | 24.2 ± 3.6                    |
| All    | 19     | 22.8 ± 3.6     | 69.8 ± 12.5       | 1.76 ± 0.08        | 22.5 ± 3.3                    |

**Table S2.** Location and point of application of the 43 markers used during motion capture.

| Marker location                                       | Point of application | Total quantity |
|-------------------------------------------------------|----------------------|----------------|
| Acromion (Left & Right)                               | Clothes              | 2              |
| Sternum                                               | Clothes              | 1              |
| Anterior Superior Iliac Spine (Left & Right)          | Added mass belt      | 2              |
| Sacrum                                                | Added mass belt      | 1              |
| Mid Anterior Superior Iliac Spine (for tracking only) | Added mass belt      | 1              |
| 4-Marker Thigh Plate (Left & Right)                   | Coban wrap           | 8              |
| Femur Lateral Epicondyle (Left & Right)               | Skin                 | 2              |
| Femur Medial Epicondyle (Left & Right)                | Skin                 | 2              |
| 4-Marker Shank Plate (Left & Right)                   | Coban wrap           | 8              |
| Ankle Lateral Malleolus (Left & Right)                | Skin/Clothes         | 2              |
| Ankle Medial Malleolus (Left & Right)                 | Skin/Clothes         | 2              |
| Foot (Left & Right)                                   | Shoes                | 12             |

**Table S3.** Highest Pearson Correlation coefficients.

| Dependent variable     | Pearson Correlation coefficient |
|------------------------|---------------------------------|
| Stride Length          | 0.551                           |
| HE Moment              | 0.485                           |
| Gait Time              | 0.397                           |
| Stance Time            | 0.394                           |
| Stride Rate            | 0.393                           |
| Cadence                | 0.393                           |
| Single Support Time    | 0.387                           |
| Gait Speed             | 0.344                           |
| Double Support Time II | 0.329                           |
| KE Moment              | 0.326                           |
| Swing Time             | 0.323                           |
| HF2                    | 0.303                           |
| HF Moment              | 0.300                           |
| KF2                    | 0.296                           |
| AP1                    | 0.291                           |
| Knee RoM               | 0.267                           |
| AD                     | 0.258                           |
| AP2                    | 0.224                           |
| AP Moment              | 0.203                           |
| KF1                    | 0.182                           |
| Double Support Time I  | 0.174                           |
| HF1                    | 0.173                           |
| Hip RoM                | 0.172                           |
| KF3                    | 0.163                           |
| Ankle RoM              | 0.162                           |
| HE                     | 0.151                           |
| KF Moment              | 0.132                           |
| KE                     | 0.095                           |

The coefficients shown here are the highest magnitudes across all independent variables. Independent variables: Age (years), Body mass (kg), Body height (m), and BMI (kg/m<sup>2</sup>). Gender is assessed as a “Between Factor” in Repeated Measures ANOVA, all  $p > 0.050$  ( $\alpha = .050$ ).

**Table S4.** Mean and Standard Deviation values of sagittal-plane range of motion (RoM) in degrees.

| Amount   | Location | Hip RoM        | Knee RoM       | Ankle RoM             |
|----------|----------|----------------|----------------|-----------------------|
| Baseline | -        | 33.605 (4.983) | 68.172 (4.252) | 47.750 (4.497)        |
| Low      | Pelvis   | 33.630 (5.347) | 69.009 (3.938) | 48.427 (4.959)        |
| Low      | Thigh    | 33.268 (4.771) | 68.305 (3.712) | 47.561 (4.949)        |
| Low      | Shank    | 32.558 (5.689) | 68.093 (4.288) | <b>48.399 (4.742)</b> |
| High     | Pelvis   | 32.918 (5.643) | 68.575 (4.147) | 47.988 (5.722)        |
| High     | Thigh    | 33.090 (5.179) | 66.686 (4.683) | 46.667 (4.616)        |
| High     | Shank    | 32.220 (5.485) | 67.133 (4.554) | <b>48.551 (4.801)</b> |

Bold items are significantly different from the Baseline condition (both  $p < 0.020$ ,  $\alpha = .050$ ).

**Table S5.** Mean and Standard Deviation values of the spatiotemporal metrics.

| Amount   | Location | Stride Length (m) | Stride Rate (Hz) | Cadence (steps/min) | Gait Speed (m/s)               | Stance Time (s)  | Swing Time (s)                 | Double Support Time I (s)      | Double Support Time II (s)     | Single Support Time (s)        |
|----------|----------|-------------------|------------------|---------------------|--------------------------------|------------------|--------------------------------|--------------------------------|--------------------------------|--------------------------------|
| Baseline | -        | 1.444<br>(0.104)  | 0.890<br>(0.061) | 106.783<br>(7.305)  | 1.286<br>(0.139)               | 0.698<br>(0.053) | 0.431<br>(0.028)               | 0.149<br>(0.019)               | 0.139<br>(0.021)               | 0.411<br>(0.026)               |
| Low      | Pelvis   | 1.448<br>(0.106)  | 0.891<br>(0.061) | 106.937<br>(7.293)  | 1.292<br>(0.142)               | 0.697<br>(0.052) | 0.431<br>(0.030)               | 0.150<br>(0.017)               | 0.140<br>(0.021)               | 0.406<br>(0.028)               |
| Low      | Thigh    | 1.453<br>(0.109)  | 0.886<br>(0.054) | 106.351<br>(6.447)  | 1.288<br>(0.137)               | 0.699<br>(0.049) | 0.434<br>(0.026)               | 0.149<br>(0.018)               | 0.139<br>(0.022)               | 0.411<br>(0.025)               |
| Low      | Shank    | 1.448<br>(0.114)  | 0.887<br>(0.060) | 106.485<br>(7.222)  | 1.286<br>(0.144)               | 0.699<br>(0.053) | 0.433<br>(0.031)               | 0.146<br>(0.018)               | 0.136<br>(0.021)               | 0.417<br>(0.027)               |
| High     | Pelvis   | 1.435<br>(0.117)  | 0.881<br>(0.059) | 105.724<br>(7.112)  | <b>1.265</b><br><b>(0.143)</b> | 0.706<br>(0.053) | 0.434<br>(0.031)               | <b>0.154</b><br><b>(0.017)</b> | <b>0.144</b><br><b>(0.021)</b> | 0.407<br>(0.025)               |
| High     | Thigh    | 1.446<br>(0.114)  | 0.881<br>(0.052) | 105.731<br>(6.235)  | 1.275<br>(0.132)               | 0.701<br>(0.046) | <b>0.438</b><br><b>(0.026)</b> | 0.149<br>(0.015)               | 0.138<br>(0.019)               | 0.414<br>(0.026)               |
| High     | Shank    | 1.445<br>(0.117)  | 0.882<br>(0.061) | 105.843<br>(7.370)  | 1.276<br>(0.152)               | 0.700<br>(0.053) | <b>0.439</b><br><b>(0.033)</b> | 0.145<br>(0.018)               | <b>0.134</b><br><b>(0.023)</b> | <b>0.421</b><br><b>(0.028)</b> |

Bold items are significantly different from the Baseline condition (all  $p < 0.050$ ,  $\alpha = .050$ ).

**Table S6.** P-Value (Power) for analyzed metrics with two-way, repeated measures ANOVA.

| Metric                 | Mass Location factor | Mass Amount factor |
|------------------------|----------------------|--------------------|
| Stride Length          | 0.008 (0.804)        | 0.008 (0.804)      |
| Stride Rate            | 0.000 (0.997)        | 0.000 (0.997)      |
| Cadence                | 0.000 (0.997)        | 0.000 (0.997)      |
| Gait Speed             | 0.000 (0.995)        | 0.000 (0.995)      |
| Stance Time            | 0.005 (0.844)        | 0.005 (0.844)      |
| Swing Time             | 0.000 (0.998)        | 0.000 (0.998)      |
| Double Support Time I  | 0.188 (0.354)        | 0.188 (0.354)      |
| Double Support Time II | 0.848 (0.076)        | 0.848 (0.076)      |
| Single Support Time    | 0.016 (0.732)        | 0.016 (0.732)      |
| Gait Time              | 0.000 (0.996)        | 0.000 (0.996)      |
| AP1                    | 0.000 (0.999)        | 0.000 (0.999)      |
| AD                     | 0.000 (1.000)        | 0.000 (1.000)      |
| AP2                    | 0.000 (1.000)        | 0.000 (1.000)      |
| Ankle RoM              | 0.000 (0.995)        | 0.000 (0.995)      |
| KF1                    | 0.022 (0.697)        | 0.022 (0.697)      |
| KF2                    | 0.001 (0.930)        | 0.001 (0.930)      |
| KE                     | 0.000 (0.951)        | 0.000 (0.951)      |
| KF3                    | 0.000 (0.999)        | 0.000 (0.999)      |
| Knee RoM               | 0.000 (1.000)        | 0.000 (1.000)      |
| HF1                    | 0.000 (0.999)        | 0.000 (0.999)      |
| HE                     | 0.000 (0.975)        | 0.000 (0.975)      |
| HF2                    | 0.007 (0.808)        | 0.007 (0.808)      |
| Hip RoM                | 0.023 (0.690)        | 0.023 (0.690)      |
| AP Moment              | 0.000 (1.000)        | 0.000 (1.000)      |
| KE Moment              | 0.000 (1.000)        | 0.000 (1.000)      |
| KF Moment              | 0.044 (0.604)        | 0.044 (0.604)      |
| HF Moment              | 0.000 (1.000)        | 0.000 (1.000)      |
| HE Moment              | 0.005 (0.836)        | 0.005 (0.836)      |

Values are extracted and rounded through NCSS ( $\alpha = .050$ ).

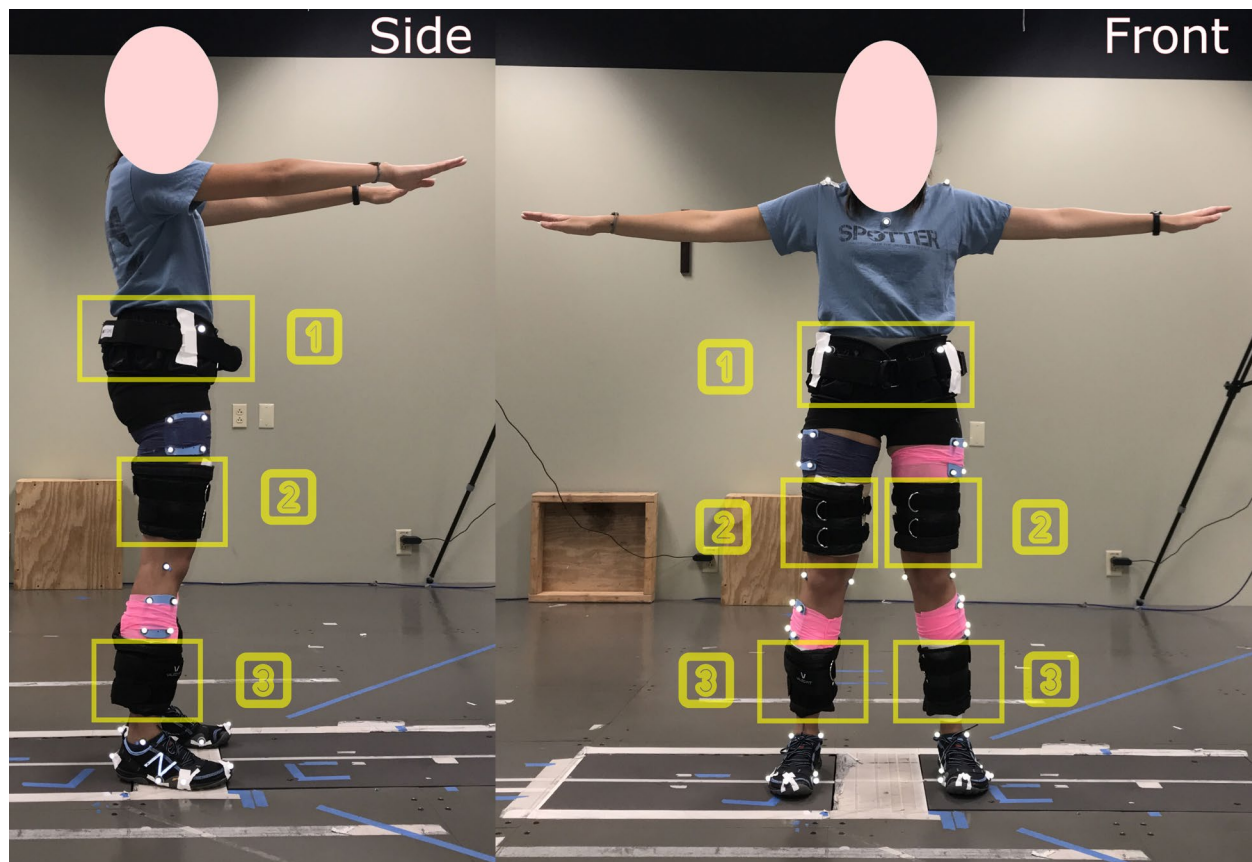

**Figure S1.** Front and side views showing the placement of markers and belts containing the added masses. Sacrum marker is not shown here. Brackets show the location of the added masses. Bracket labeled “1”: Added mass at the Pelvis location with an amount of 0/+8/+16 lb; Brackets labeled “2”: Added mass at the Thigh location each with an amount of 0/+2/+4 lb; Brackets labeled “3”: Added mass at the Shank location each with an amount of 0/+2/+4 lb.

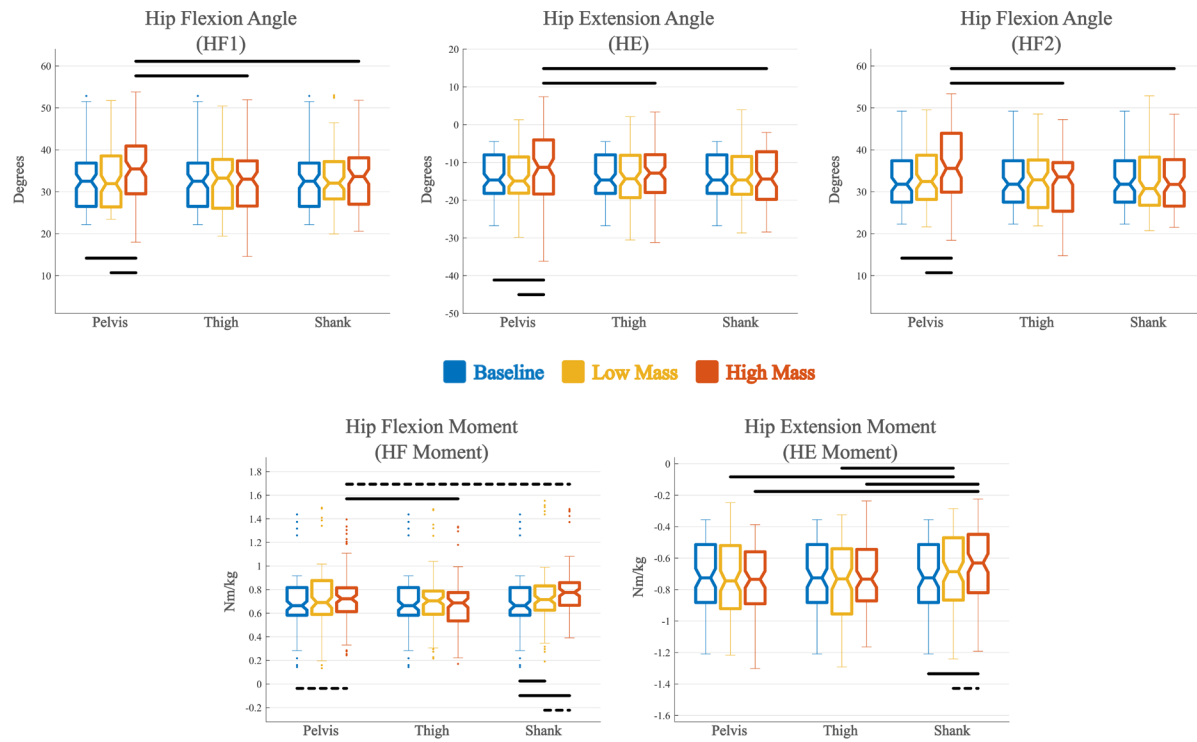

**Figure S2.** Box plots of peak hip joint kinematic and kinetics at different added mass locations. Each pair of conditions significantly different from each other is connected by a horizontal bar ( $\alpha = 0.050$ ). Type of the bar indicates the significance level: dashed for  $0.001 \leq p < 0.050$  and solid for  $p < 0.001$ .



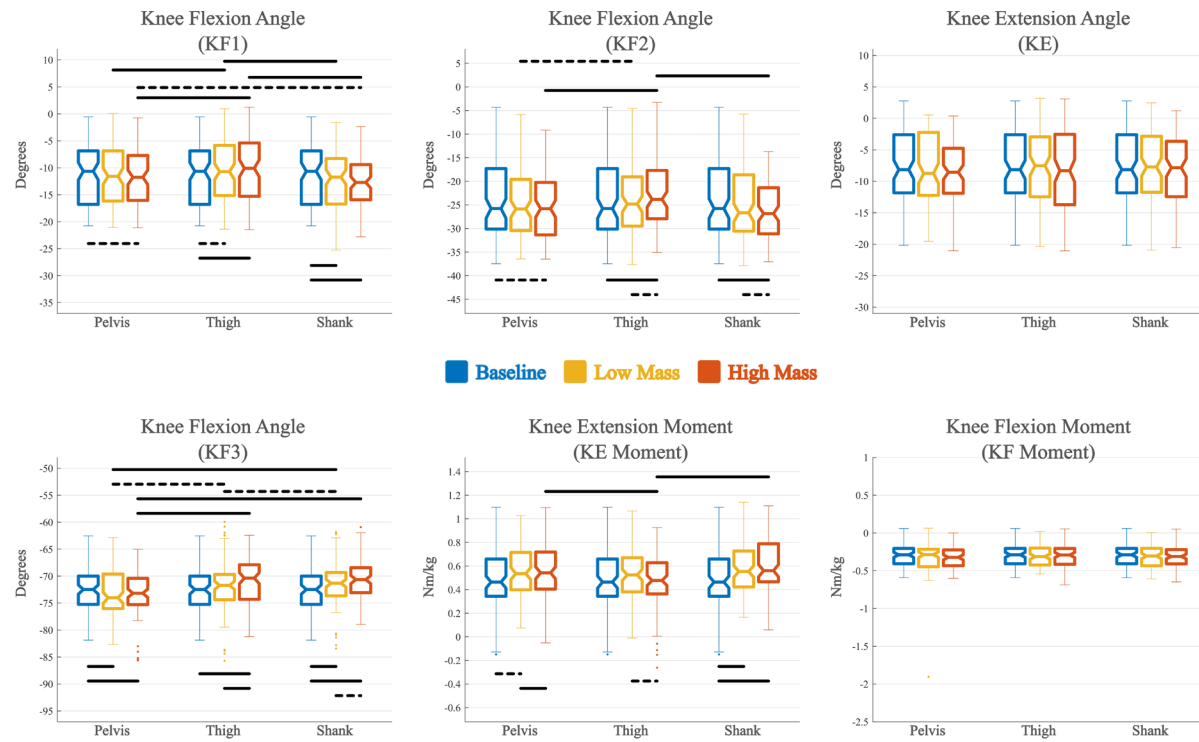

**Figure S3.** Box plots of peak knee joint kinematic and kinetics at different added mass locations. Each pair of conditions significantly different from each other is connected by a horizontal bar ( $\alpha = 0.050$ ). Type of the bar indicates the significance level: dashed for  $0.001 \leq p < 0.050$  and solid for  $p < 0.001$ .

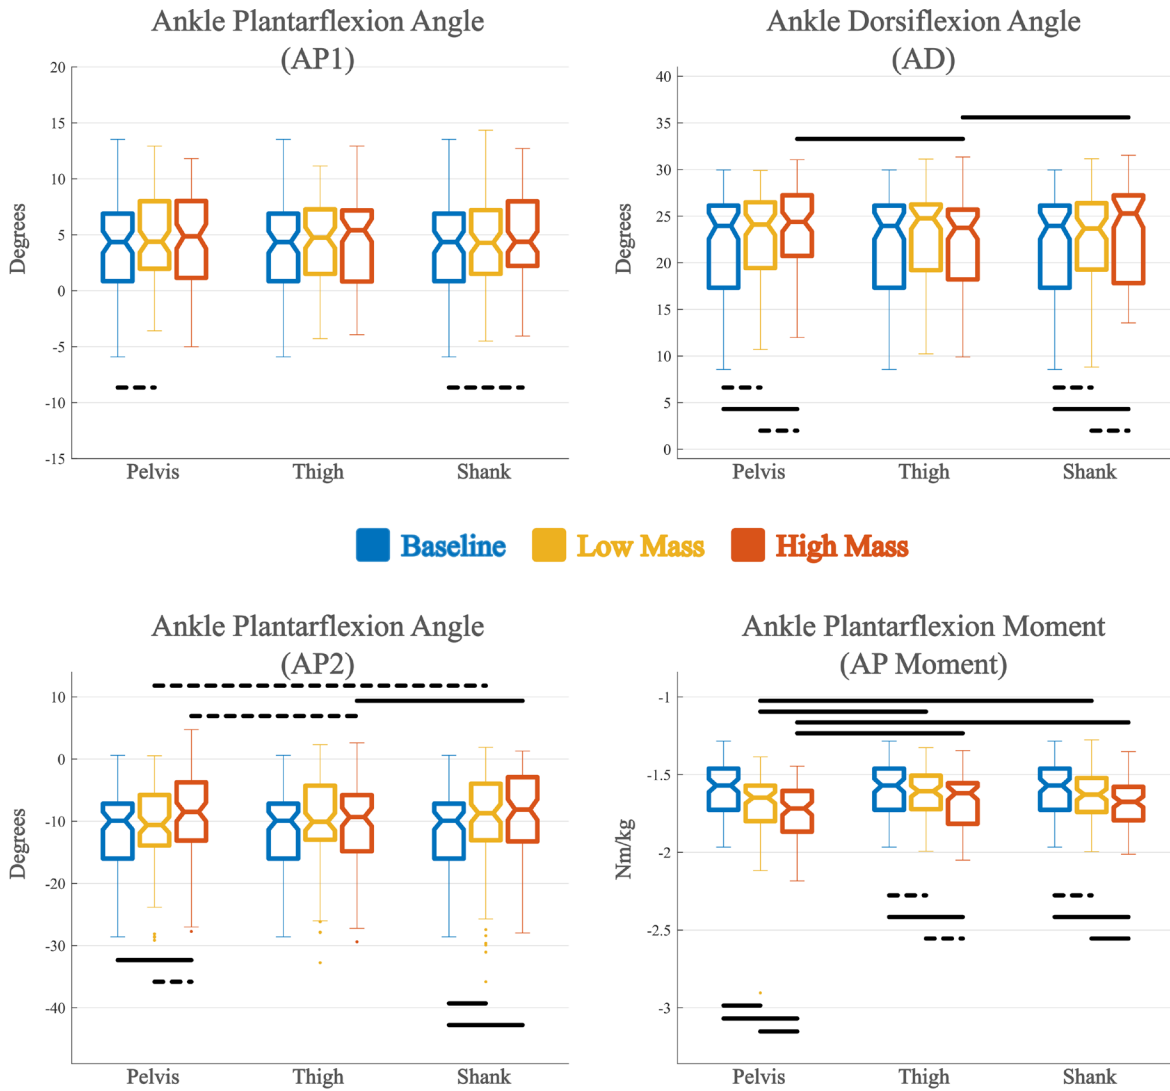

**Figure S4.** Box plots of peak ankle joint kinematic and kinetics at different added mass locations. Each pair of conditions significantly different from each other is connected by a horizontal bar ( $\alpha = 0.050$ ). Type of the bar indicates the significance level: dashed for  $0.001 \leq p < 0.050$  and solid for  $p < 0.001$ .

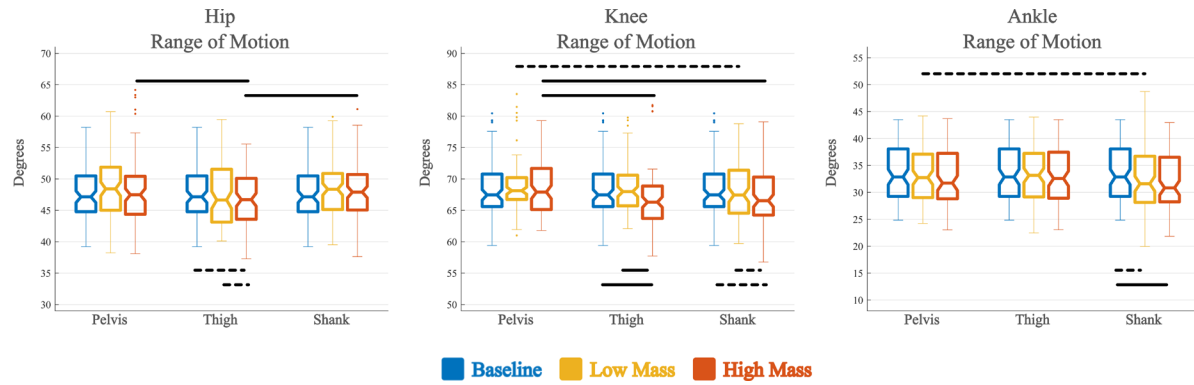

**Figure S5.** Box plots of range of motion at different added mass locations. Each pair of conditions significantly different from each other is connected by a horizontal bar ( $\alpha = 0.050$ ). Type of the bar indicates the significance level: dashed for  $0.001 \leq p < 0.050$  and solid for  $p < 0.001$ .

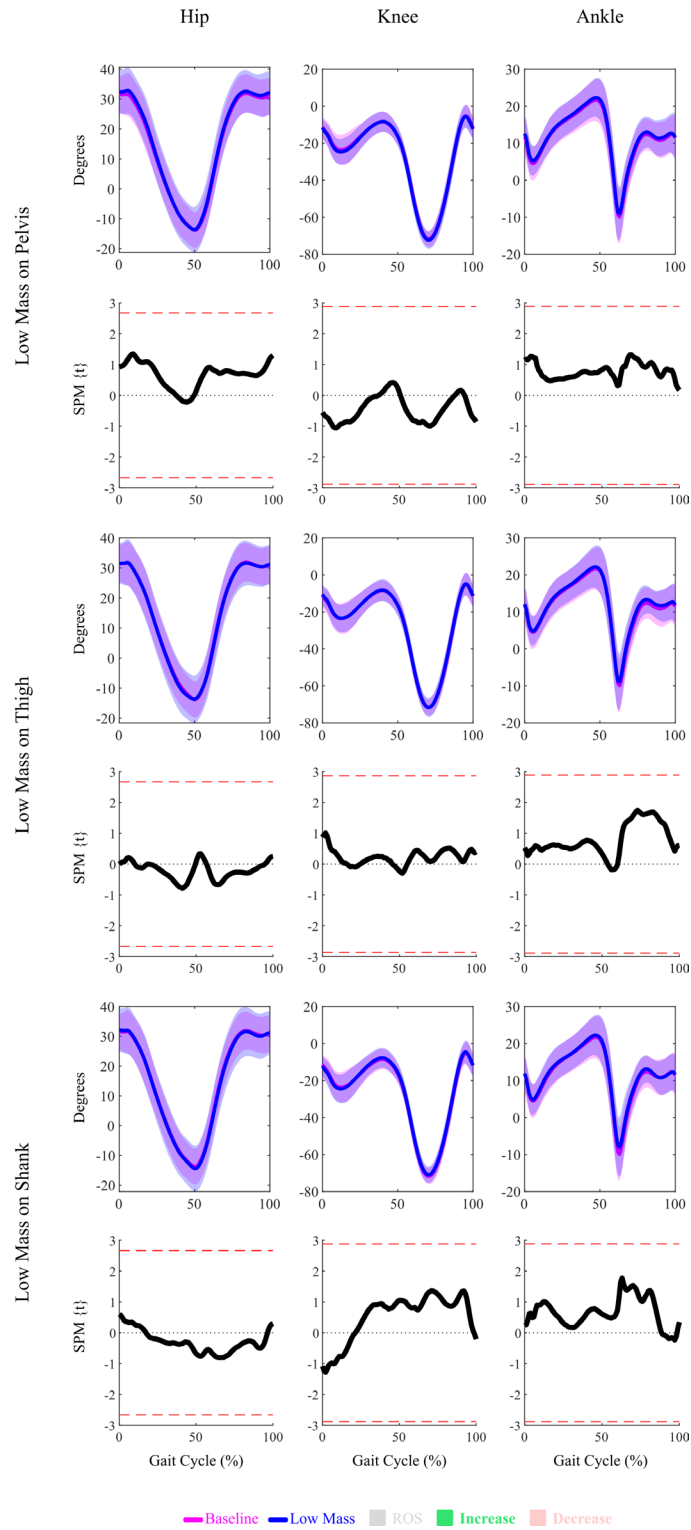

**Figure S6.** Mean and Standard Deviation plots of the joint kinematics under both the Low Mass conditions and the Baseline condition, and SPM{t} plots demonstrating the significance (Region of Significance, or ROS) of the comparisons between the Low Mass and the Baseline conditions. Upon significance, directions of changes are highlighted in color.

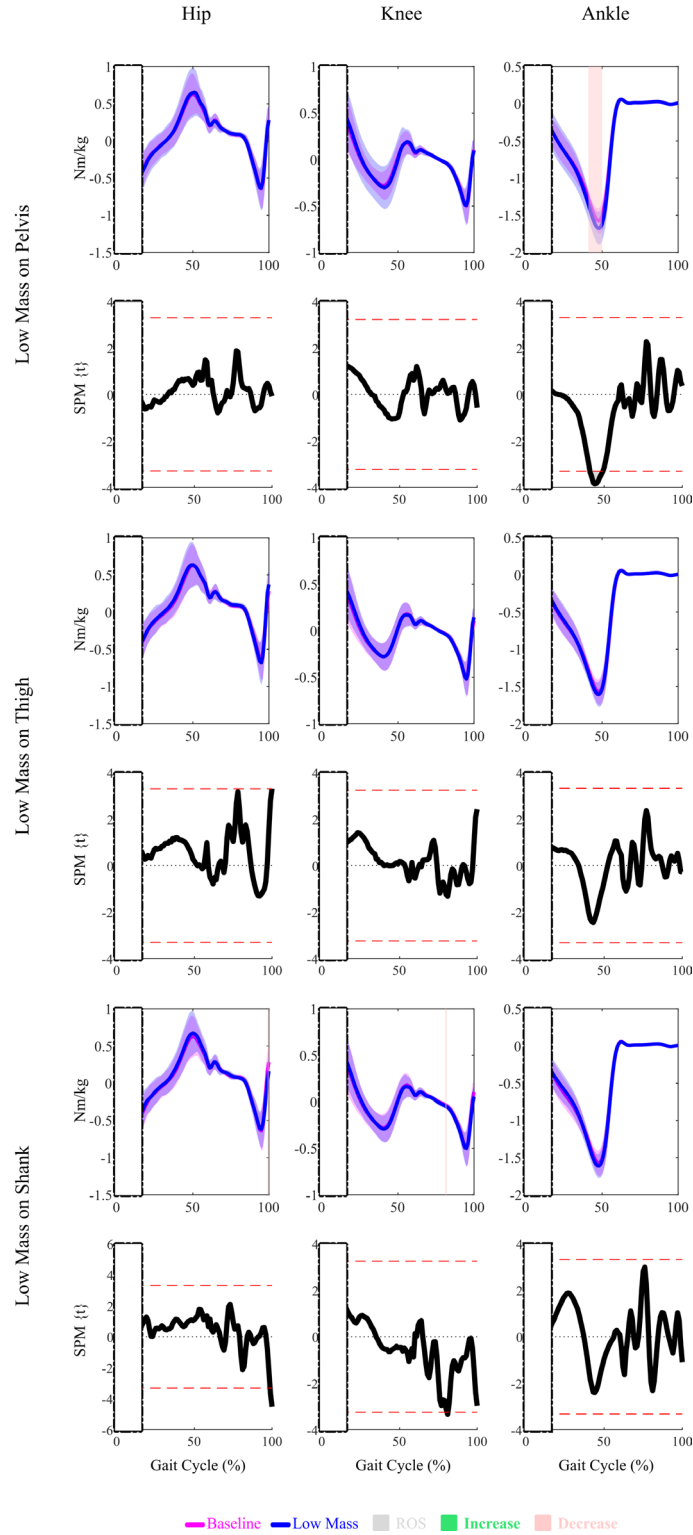

**Figure S7.** Mean and Standard Deviation plots of the joint kinetics under both the Low Mass conditions and the Baseline condition, and SPM{t} plots demonstrating the significance (Region of Significance, or ROS) of the comparisons between the Low Mass and the Baseline conditions. Upon significance, directions of changes are highlighted in color. Rectangles with dash-dotted edges are used to mask the early stance joint kinetics for lack of necessary ground reaction force data.
